# Supplementary material for: Chemotaxonomy and Antibacterial Activity of the Extracts and Chemical Constituents of Psychotria succulenta Hiern. (Rubiaceae)
Source: Hindawi journal article supplement (doi:10.1155/2022/7856305), 2022-01-01
Supplement: f1 [file 7856305.f1.pdf]

## **Chemotaxonomy and antibacterial activity of the extracts and chemical constituents of *Psychotria succulenta* Hiern. (Rubiaceae)**

Darille Claudia Ngnokam Jouogo<sup>1</sup>, Jean-De-Dieu Tamokou<sup>2,\*</sup>, Rémy Bertrand Teponno<sup>1,\*</sup>, Germaine Matsueté Takongmo<sup>2</sup>, Laurence Voutquenne-Nazabadioko<sup>3</sup>, Léon Azefack Tapondjou<sup>1</sup>, David Ngnokam<sup>1</sup>

<sup>1</sup>Research Unit of Applied and Environmental Chemistry, Department of Chemistry, Faculty of Science, University of Dschang, P.O. Box 67. Dschang Cameroon

<sup>2</sup>Research Unit of Microbiology and Antimicrobial Substances, Department of Biochemistry, Faculty of Science, University of Dschang, P.O. Box 67. Dschang Cameroon

<sup>3</sup>*Groupe Isolement et Structure, Institut de Chimie Moléculaire de Reims (ICMR), CNRS UMR 7312, Bat. 18 B.P. 1039, 51687 Reims Cedex 2, France*

***Supplementary Material***

## **FIGURE captions**

- FIGURE S1:  $^1\text{H}$  NMR spectrum of compound **1**  
FIGURE S2:  $^{13}\text{C}$  NMR spectrum of compound **1**  
FIGURE S3:  $^1\text{H}$  NMR spectrum of compound **2**  
FIGURE S4:  $^{13}\text{C}$  NMR spectrum of compound **2**  
FIGURE S5:  $^1\text{H}$  NMR spectrum of compound **3**  
FIGURE S6:  $^{13}\text{C}$  NMR spectrum of compound **3**  
FIGURE S7:  $^1\text{H}$ - $^1\text{H}$  COSY spectrum of compound **3**  
FIGURE S8: HSQC spectrum of compound **3**  
FIGURE S9: HMBC spectrum of compound **3**  
FIGURE S10: NOESY spectrum of compound **3**  
FIGURE S11:  $^1\text{H}$  NMR spectrum of compound **4**  
FIGURE S12:  $^{13}\text{C}$  NMR spectrum of compound **4**  
FIGURE S13:  $^1\text{H}$ - $^1\text{H}$  COSY spectrum of compound **4**  
FIGURE S14: HSQC spectrum of compound **4**  
FIGURE S15: HMBC spectrum of compound **4**  
FIGURE S16: NOESY spectrum of compound **4**  
FIGURE S17:  $^1\text{H}$  NMR spectrum of compound **5**  
FIGURE S18:  $^{13}\text{C}$  NMR spectrum of compound **5**  
FIGURE S19:  $^1\text{H}$  NMR spectrum of compound **6**  
FIGURE S20:  $^{13}\text{C}$  NMR spectrum of compound **6**  
FIGURE S21:  $^1\text{H}$  NMR spectrum of compound **9**  
FIGURE S22:  $^{13}\text{C}$  NMR spectrum of compound **9**  
FIGURE S23:  $^1\text{H}$  NMR spectrum of compound **10**  
FIGURE S24:  $^{13}\text{C}$  NMR spectrum of compound **10**  
FIGURE S25:  $^1\text{H}$  NMR spectrum of compound **11**  
FIGURE S26:  $^{13}\text{C}$  NMR spectrum of compound **11**  
FIGURE S27:  $^1\text{H}$  NMR spectrum of compound **12**  
FIGURE S28:  $^{13}\text{C}$  NMR spectrum of compound **12**  
FIGURE S29:  $^1\text{H}$  NMR spectrum of compound **13**  
FIGURE S30:  $^{13}\text{C}$  NMR spectrum of compound **13**  
FIGURE S31: Microtiter plate images after INT colorimetric assay.

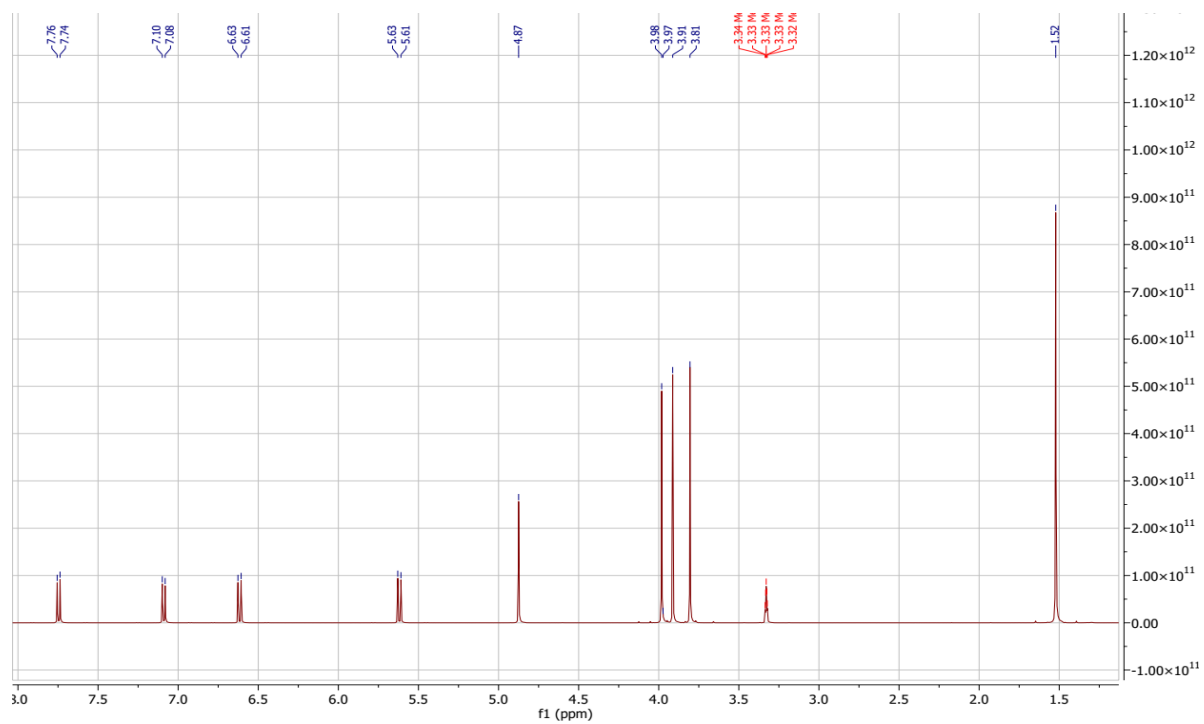

FIGURE S1:  $^1\text{H}$  NMR spectrum of compound **1**

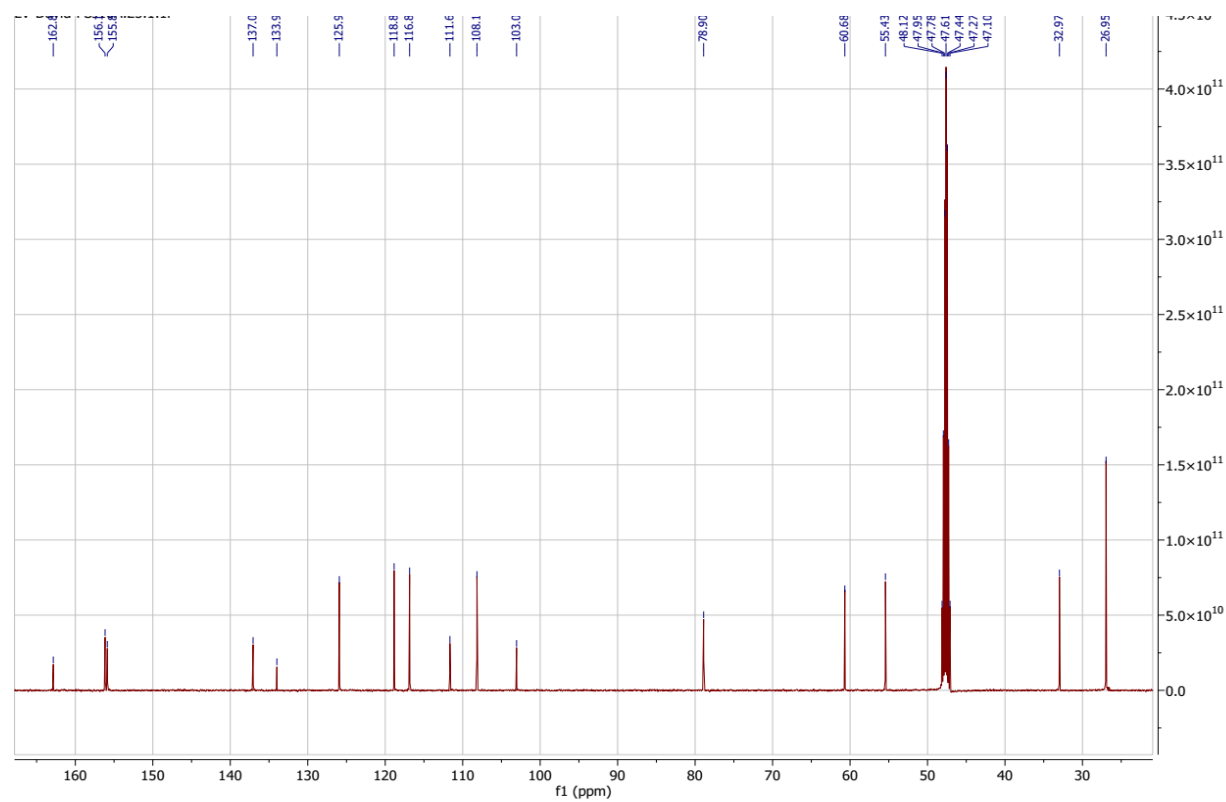

FIGURE S2:  $^{13}\text{C}$  NMR spectrum of compound **1**

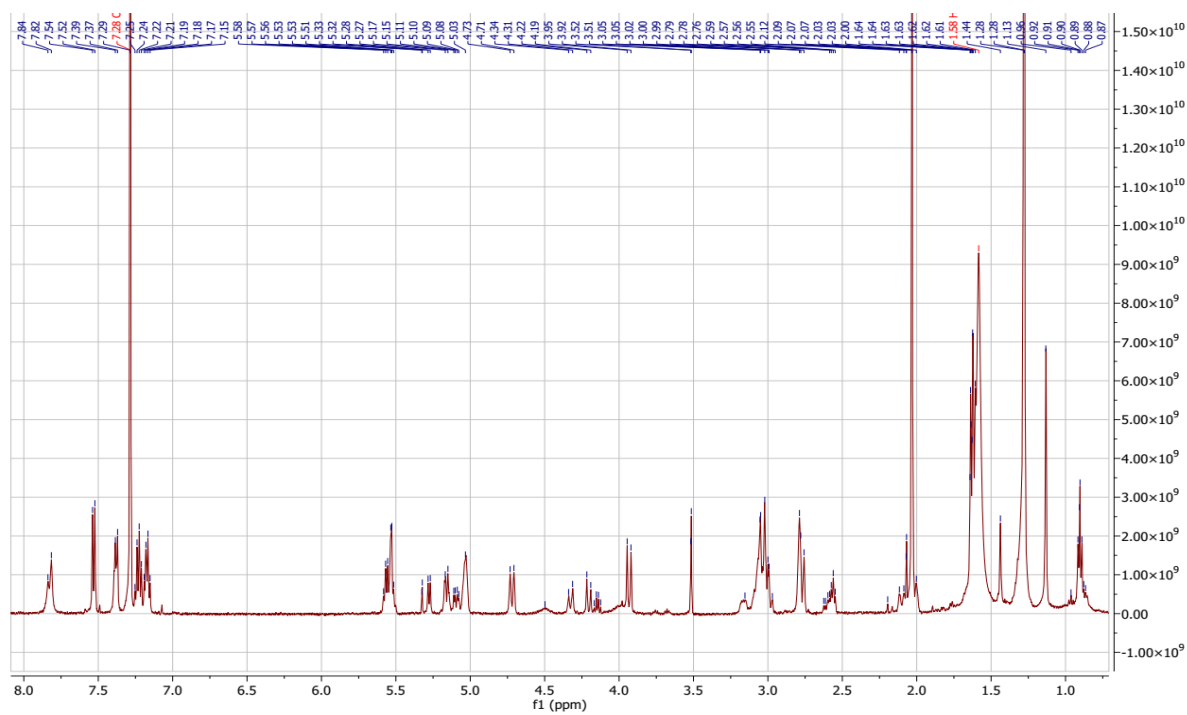

FIGURE S3:  $^1\text{H}$  NMR spectrum of compound **2**

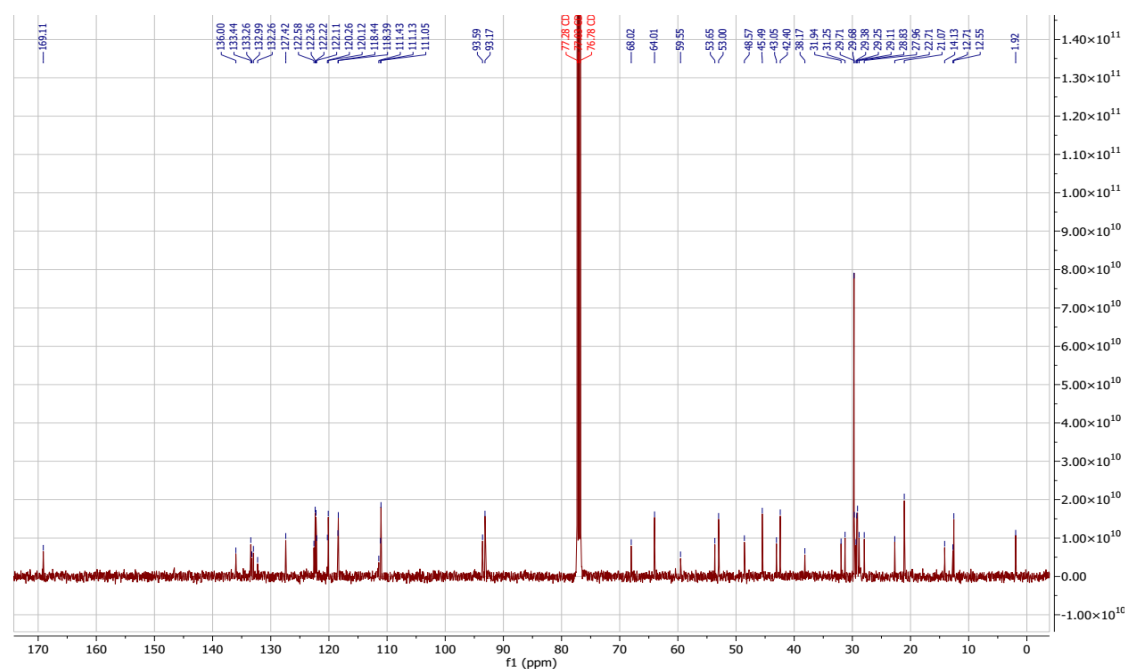

FIGURE S4:  $^{13}\text{C}$  NMR spectrum of compound **2**

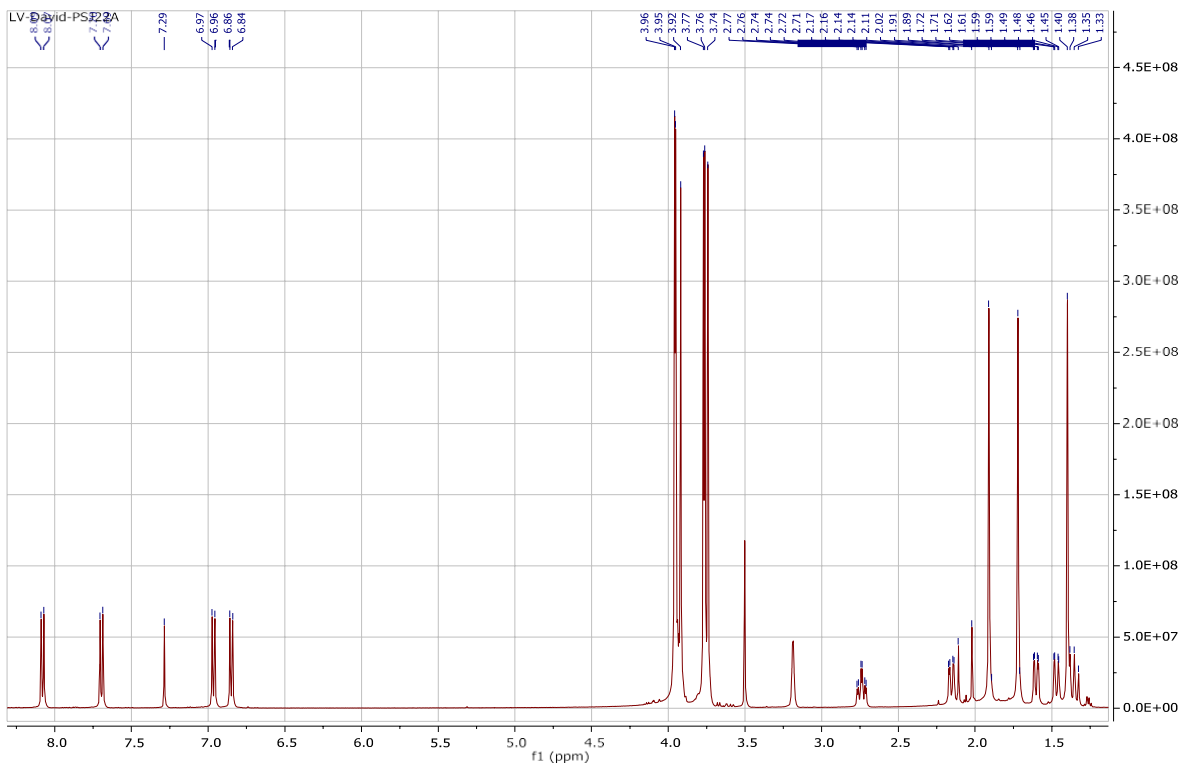

FIGURE S5:  $^1\text{H}$  NMR spectrum of compound **3**

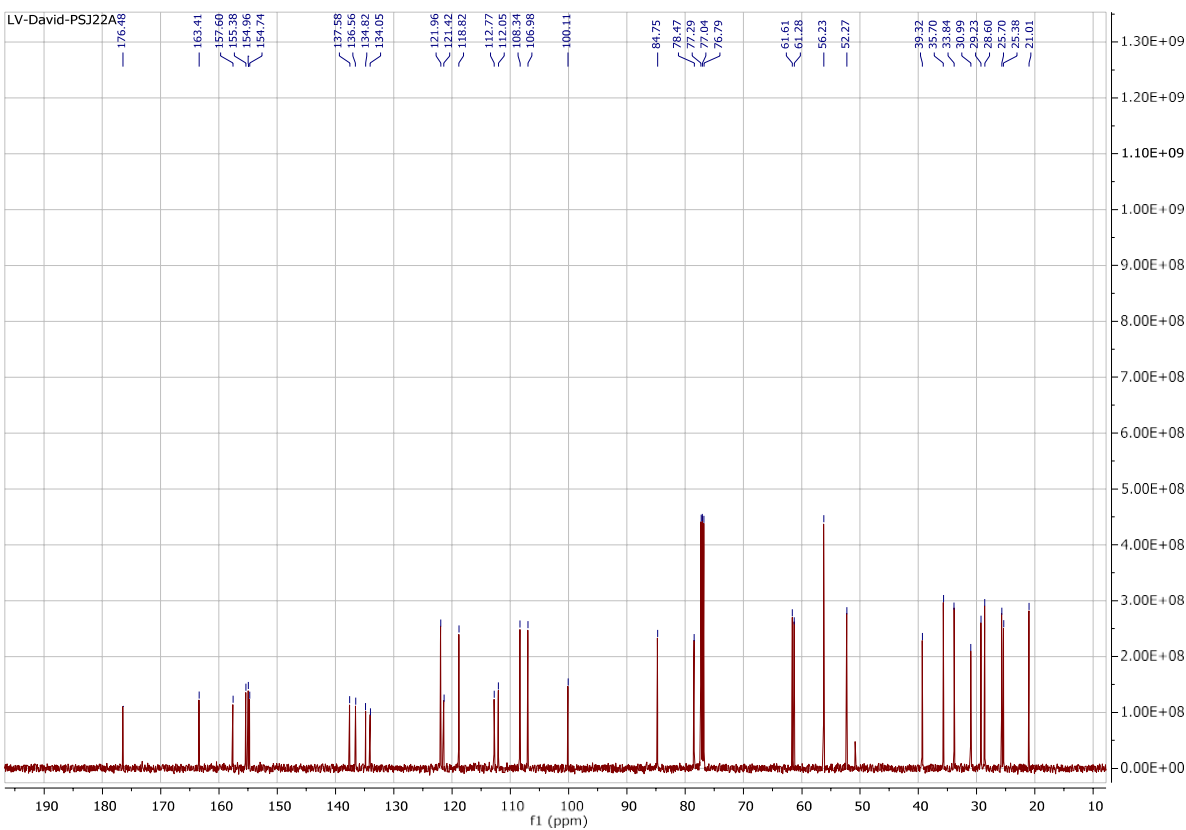

FIGURE S6:  $^{13}\text{C}$  NMR spectrum of compound **3**

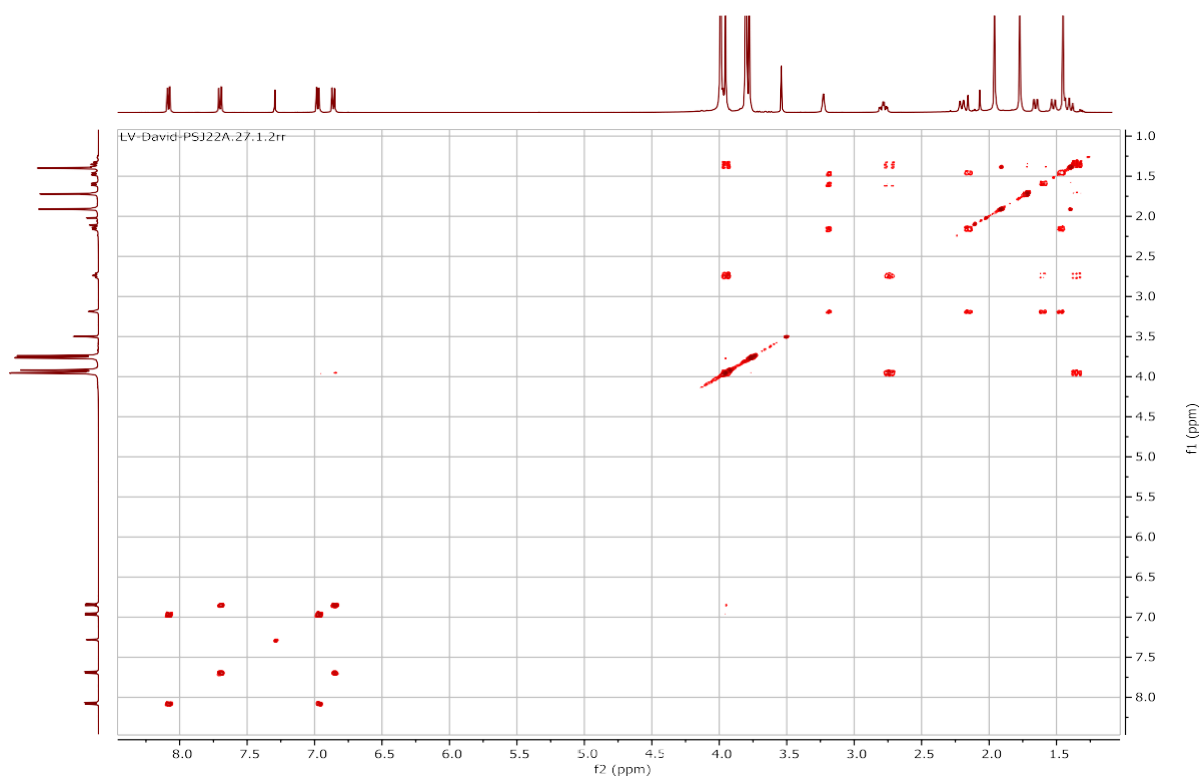

FIGURE S7:  $^1\text{H}$ - $^1\text{H}$  COSY spectrum of compound **3**

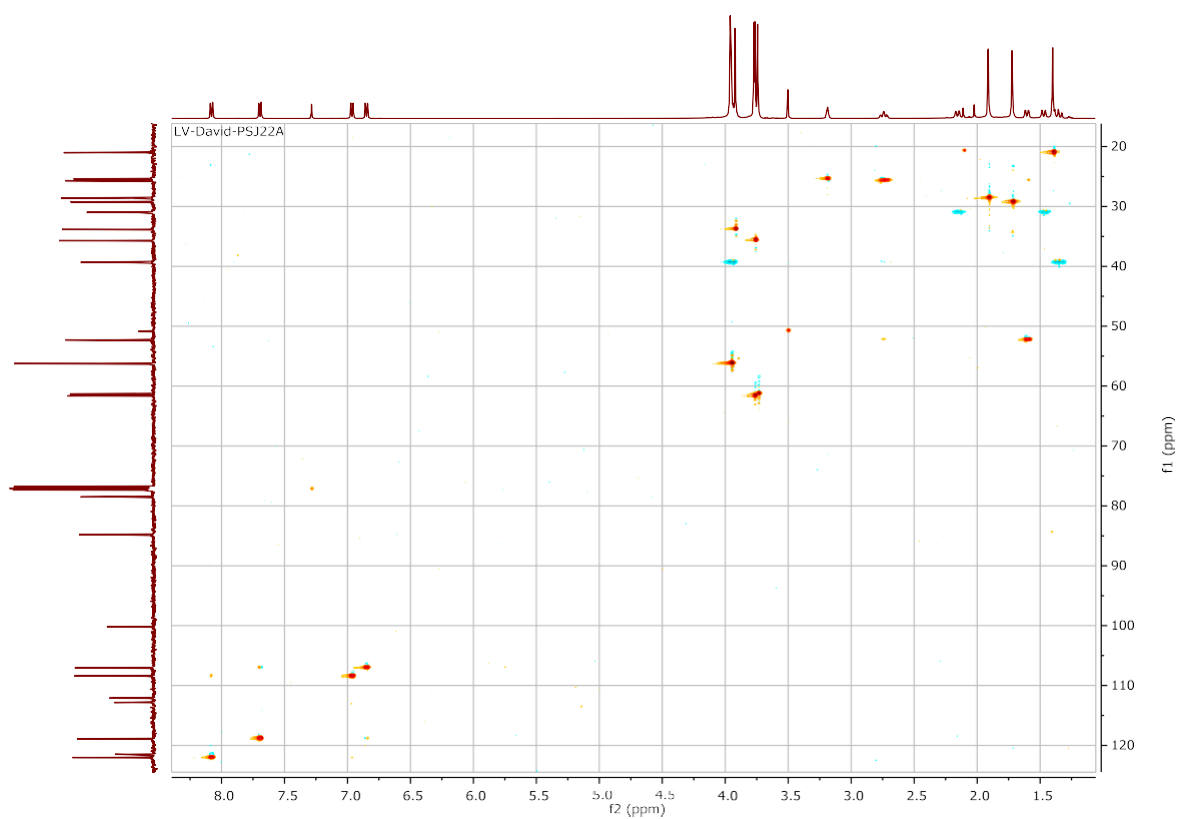

FIGURE S8: HSQC spectrum of compound **3**

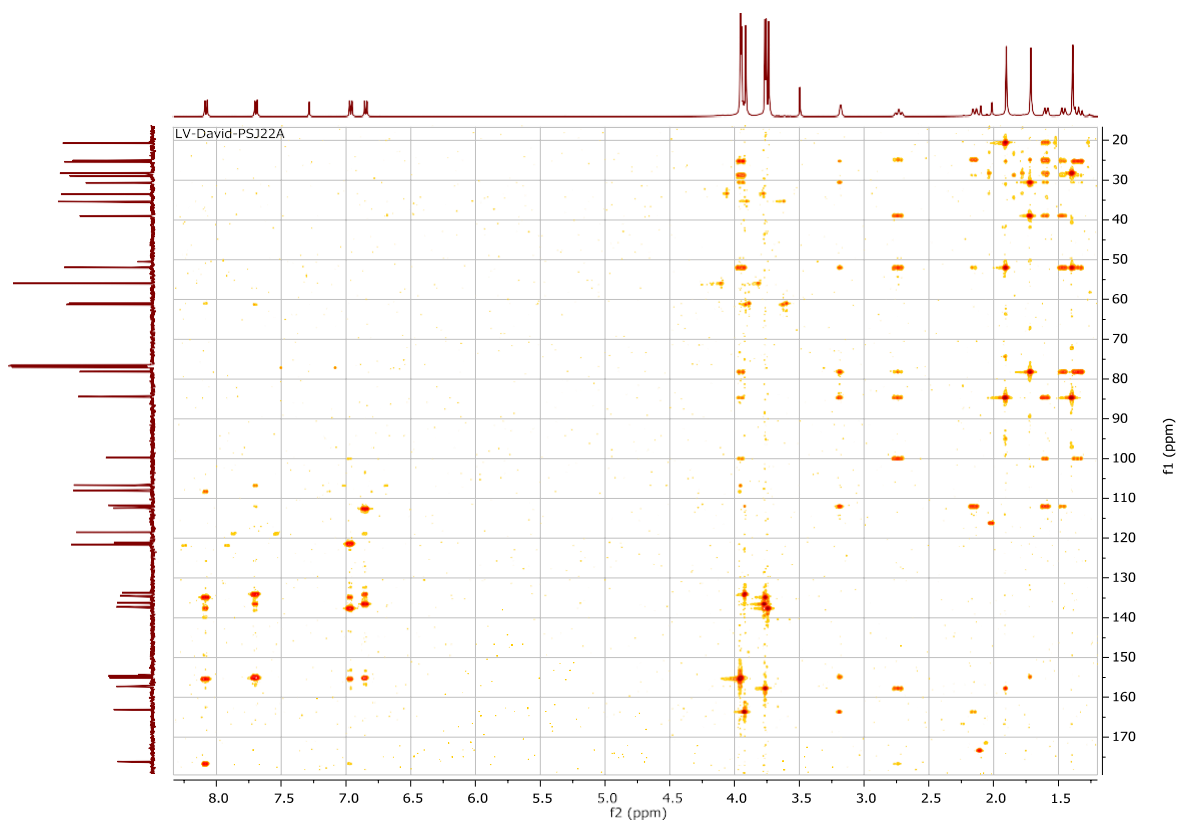

FIGURE S9: HMBC spectrum of compound **3**

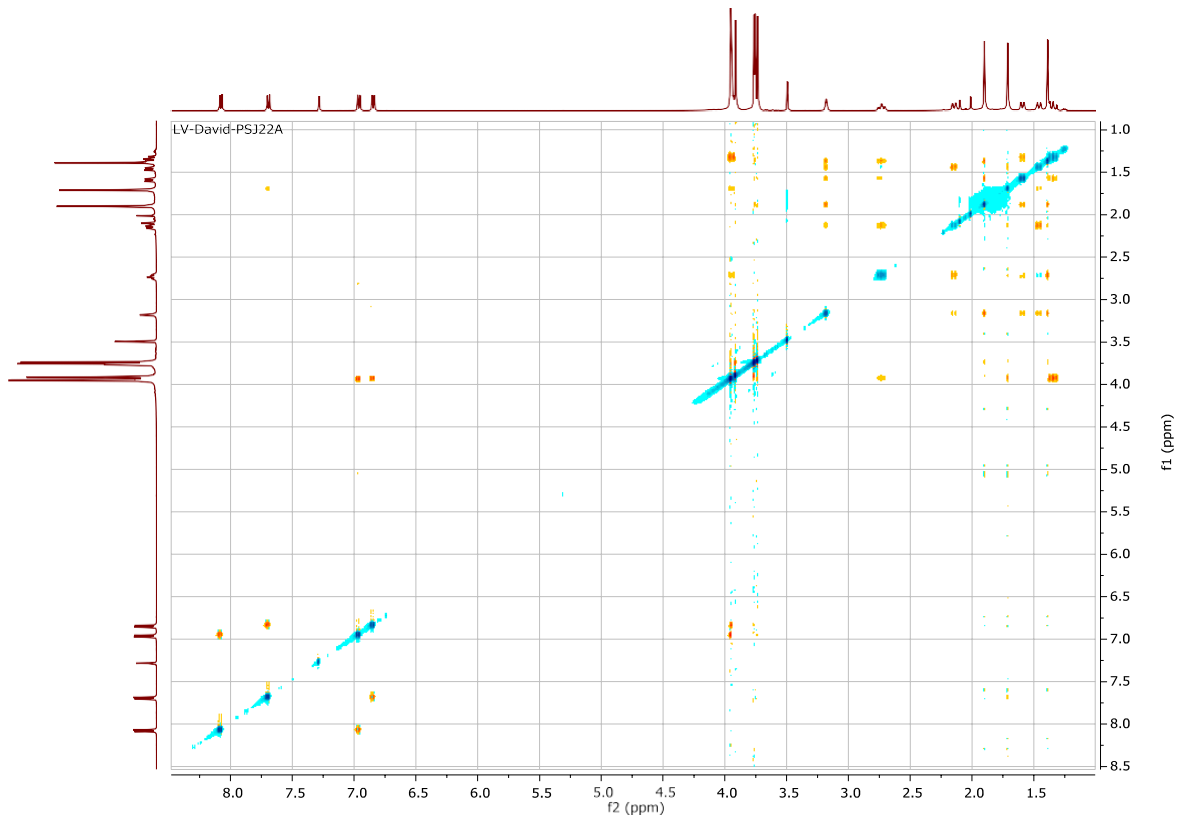

FIGURE S10: NOESY spectrum of compound **3**

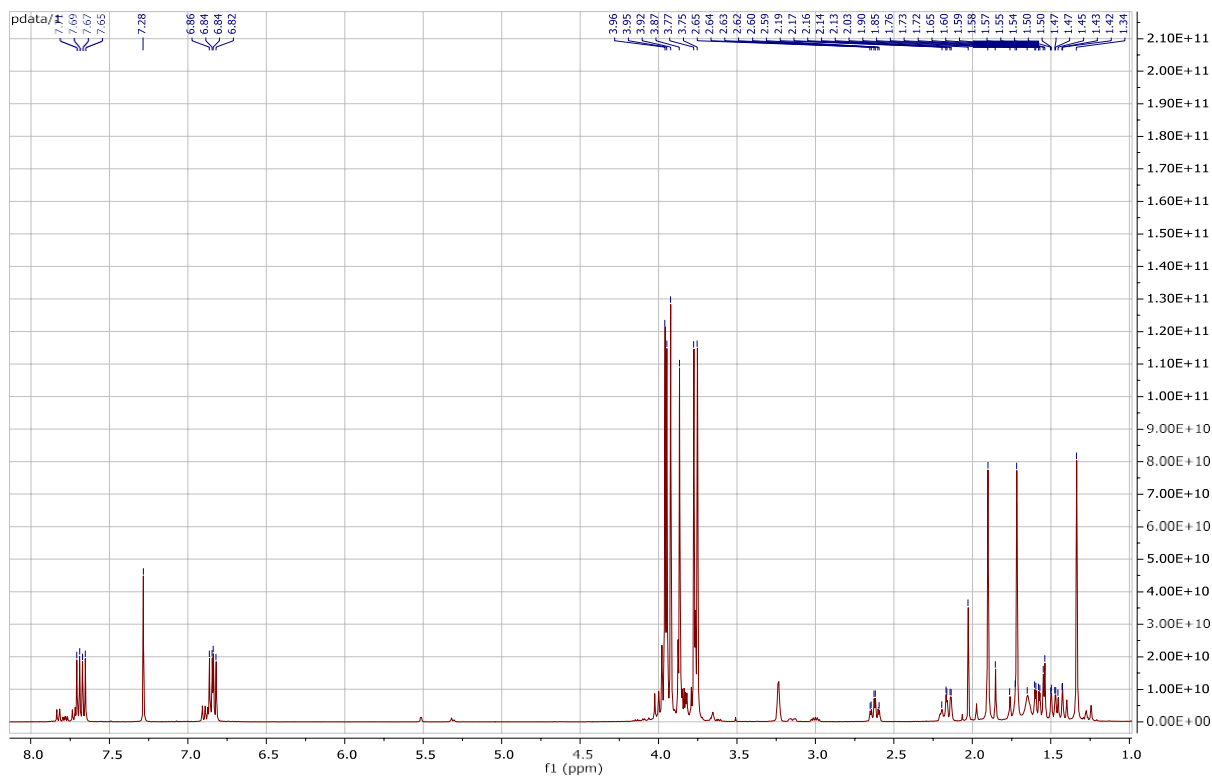

FIGURE S11:  $^1\text{H}$  NMR spectrum of compound 4

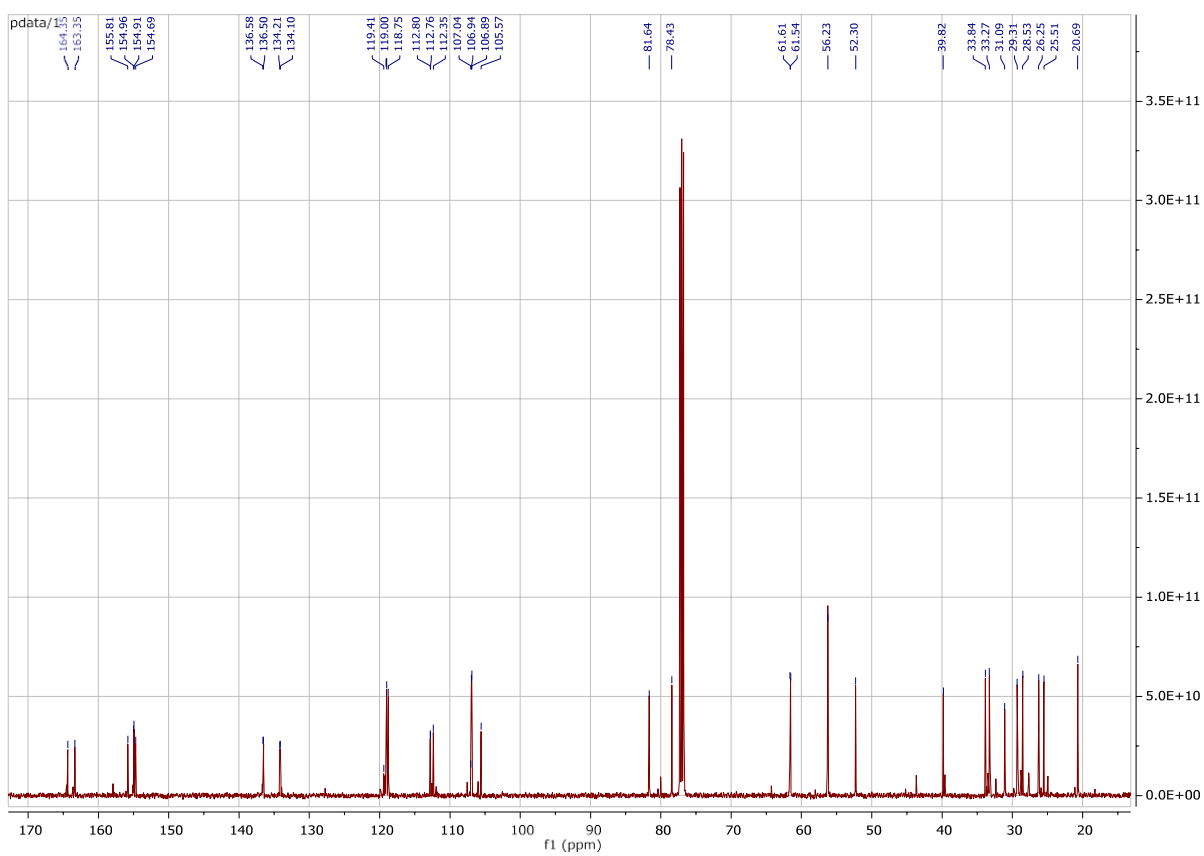

FIGURE S12:  $^{13}\text{C}$  NMR spectrum of compound 4



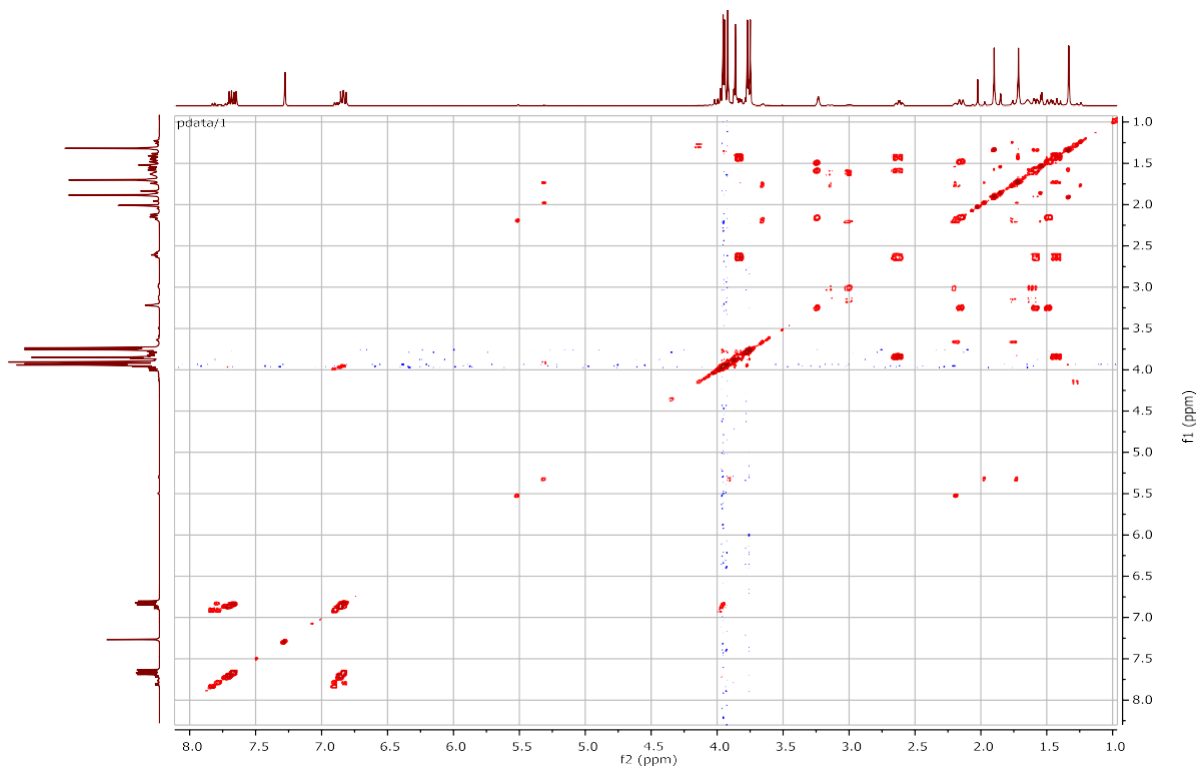

FIGURE S13:  $^1\text{H}$ - $^1\text{H}$  COSY spectrum of compound **4**

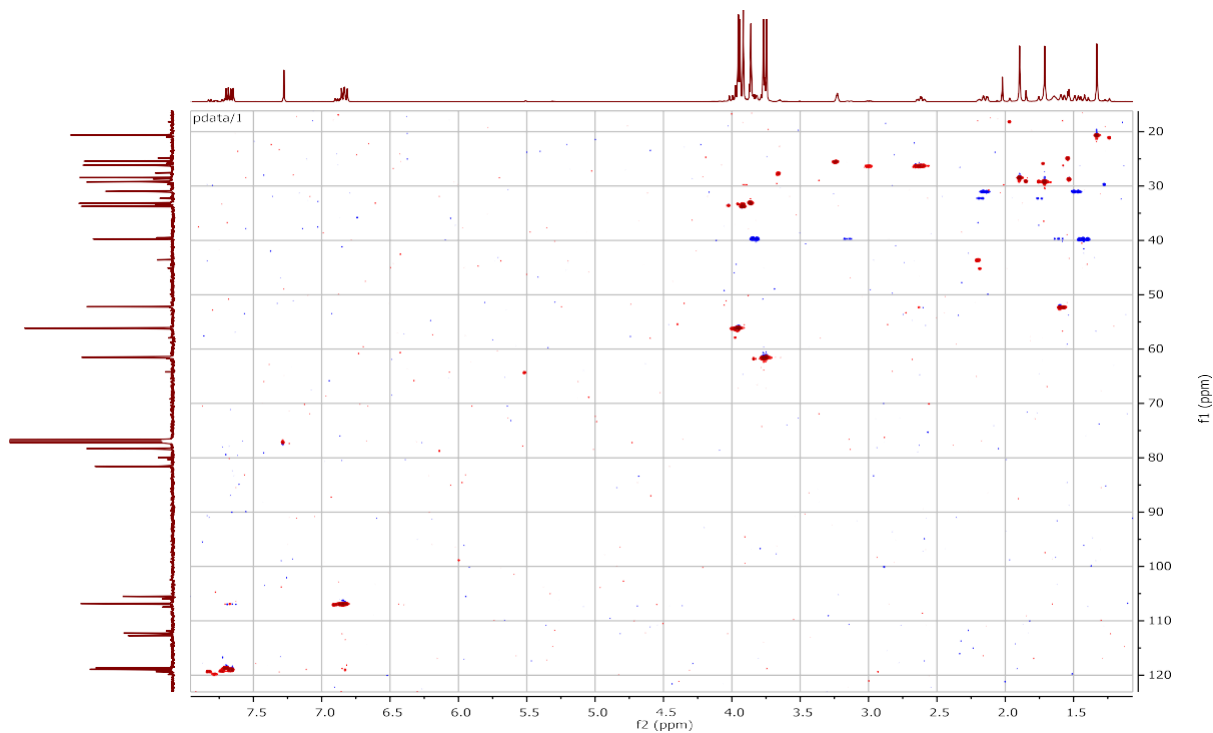

FIGURE S14: HSQC spectrum of compound **4**

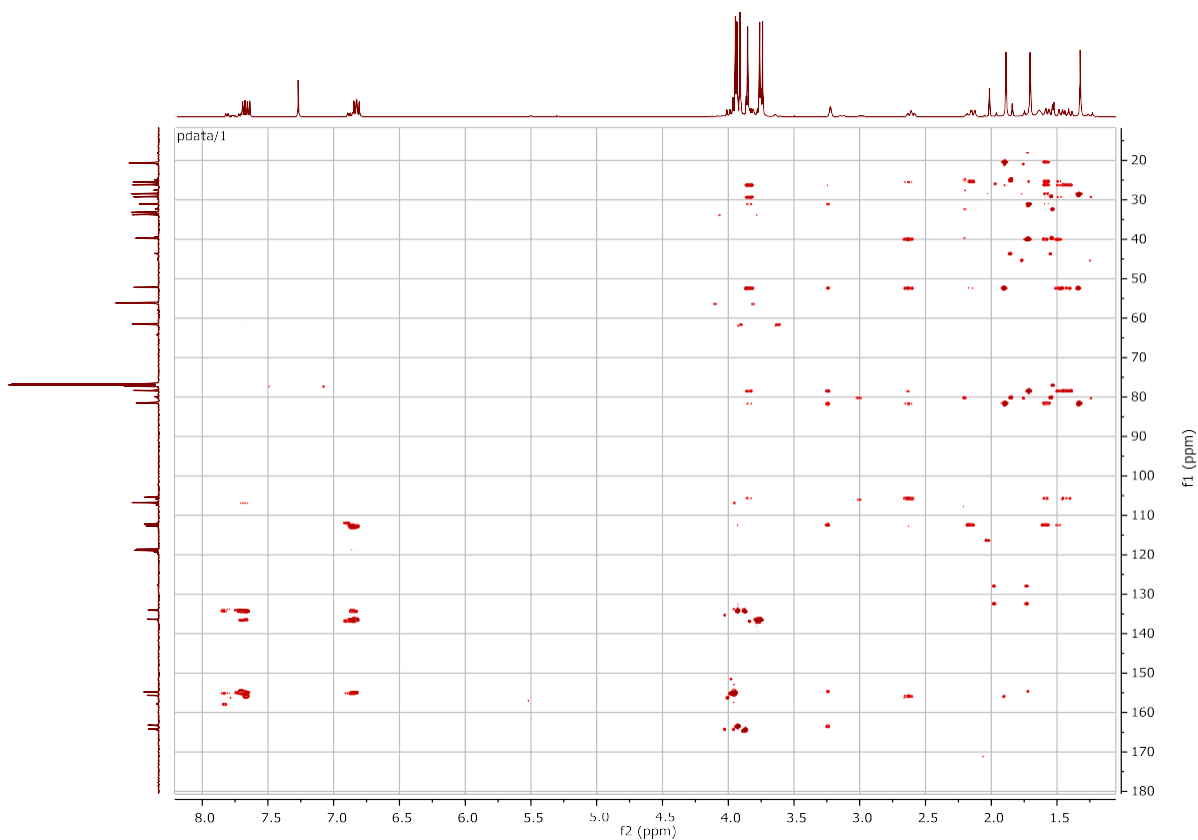

FIGURE S15: HMBC spectrum of compound **4**

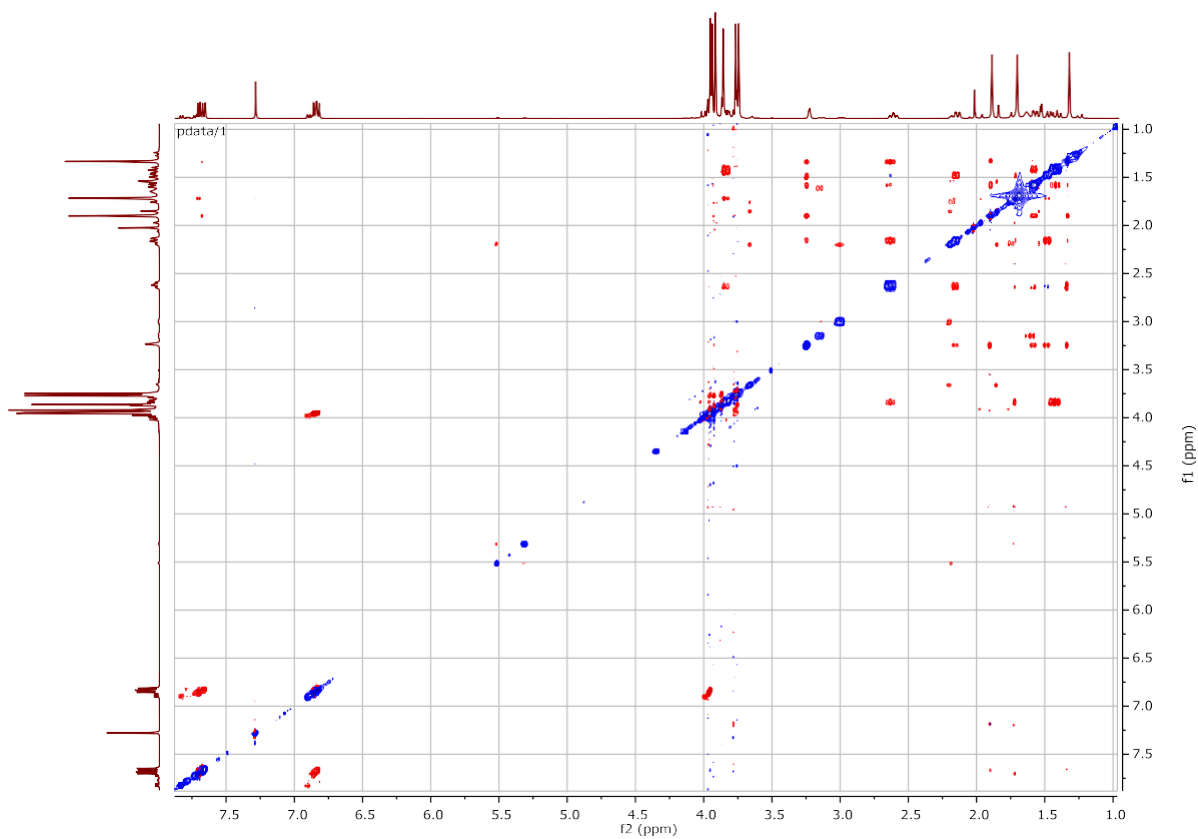

FIGURE S16: NOESY spectrum of compound **4**

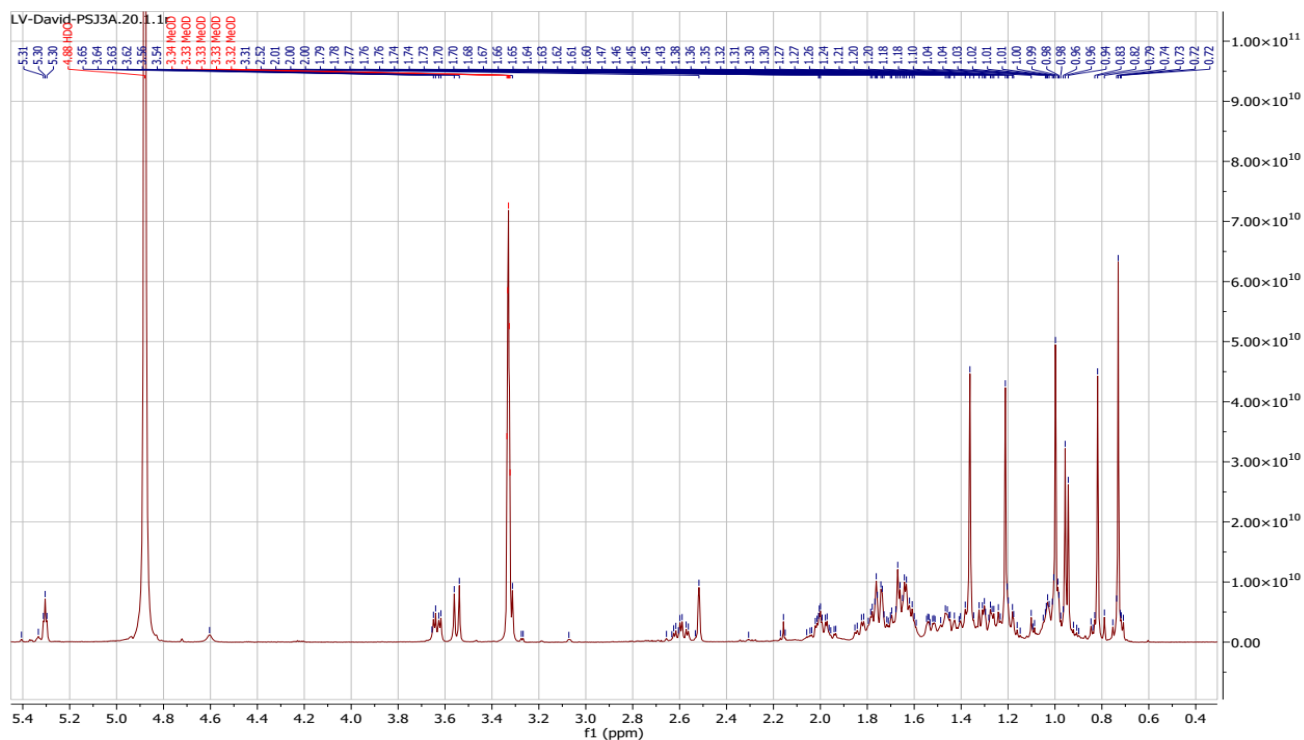

FIGURE S17:  $^1\text{H}$  NMR spectrum of compound **5**

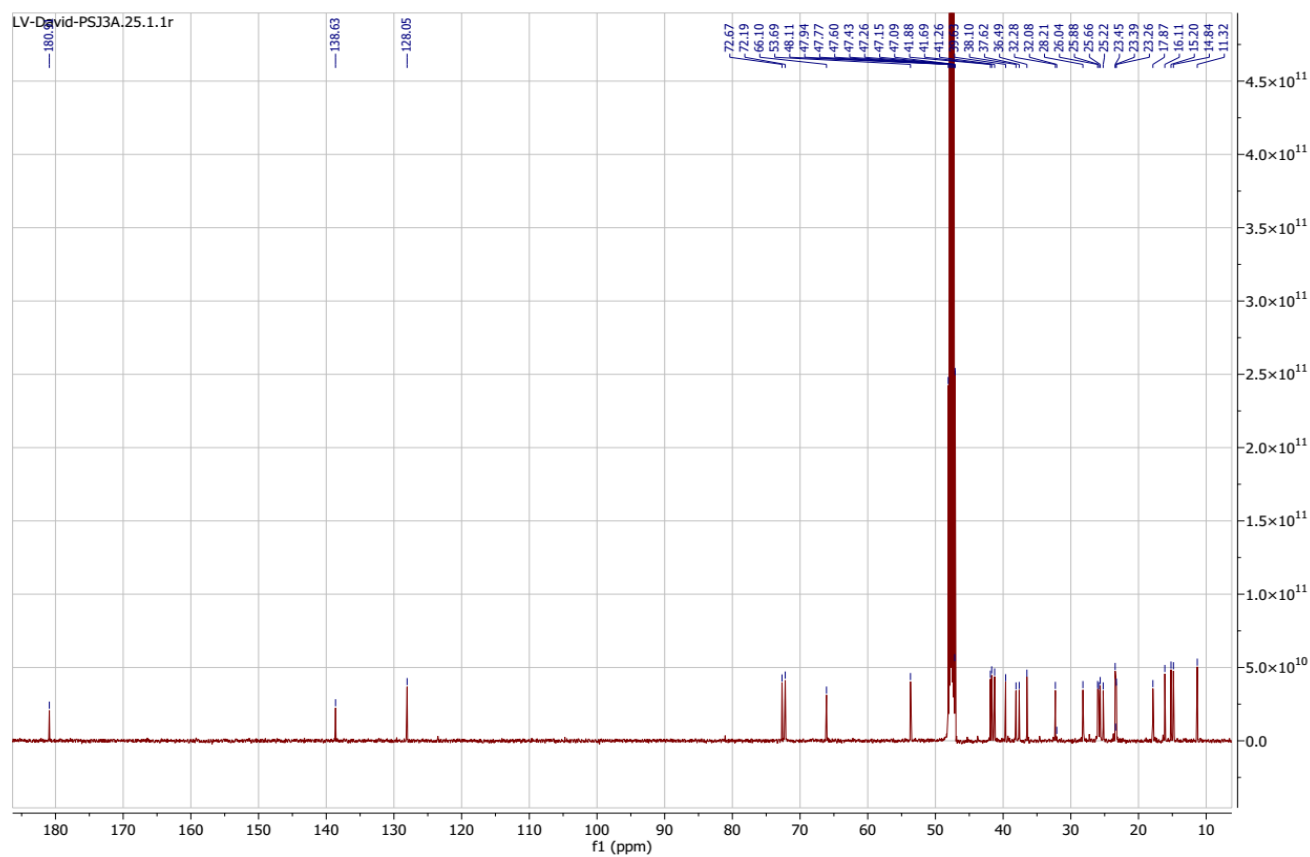

FIGURE S18:  $^{13}\text{C}$  NMR spectrum of compound **5**

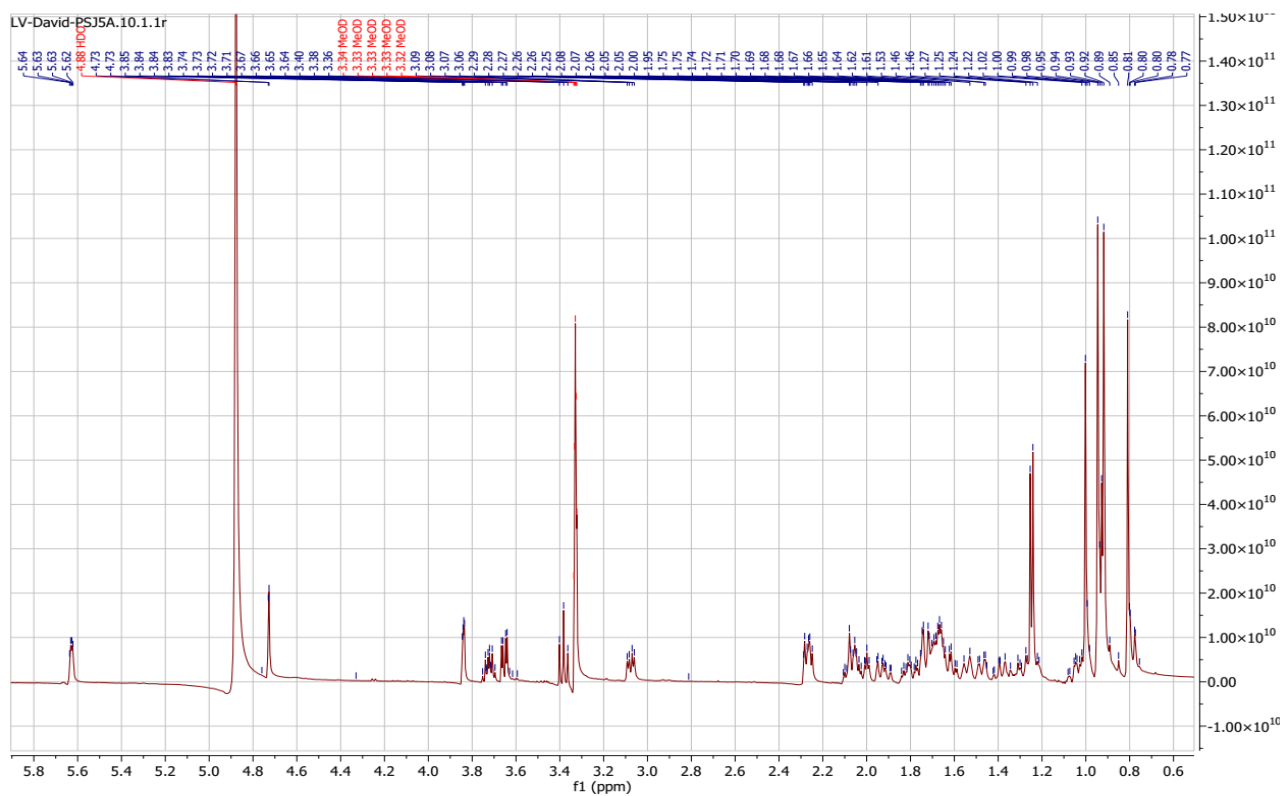

FIGURE S19:  $^1\text{H}$  NMR spectrum of compound **6**

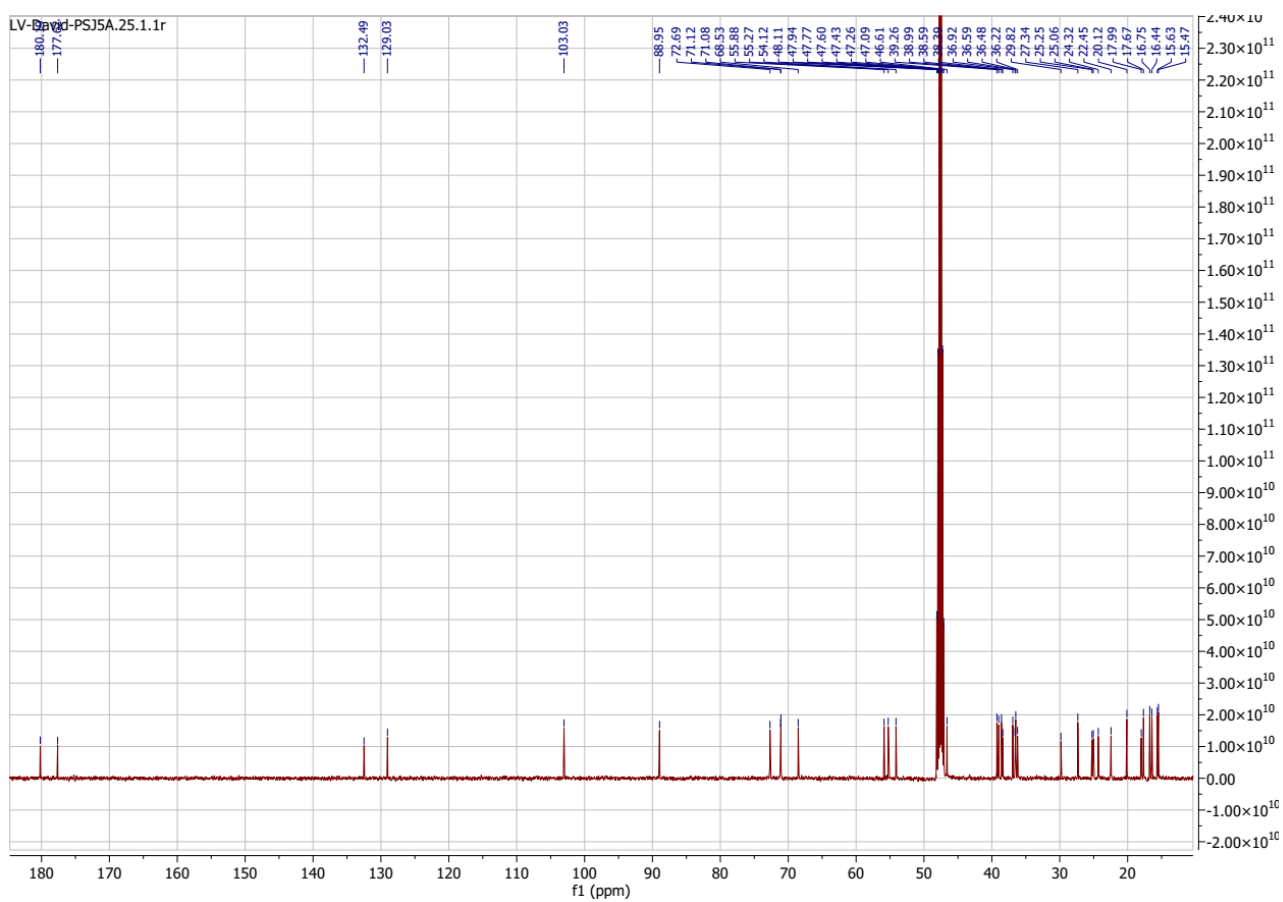

FIGURE S20:  $^{13}\text{C}$  NMR spectrum of compound **6**

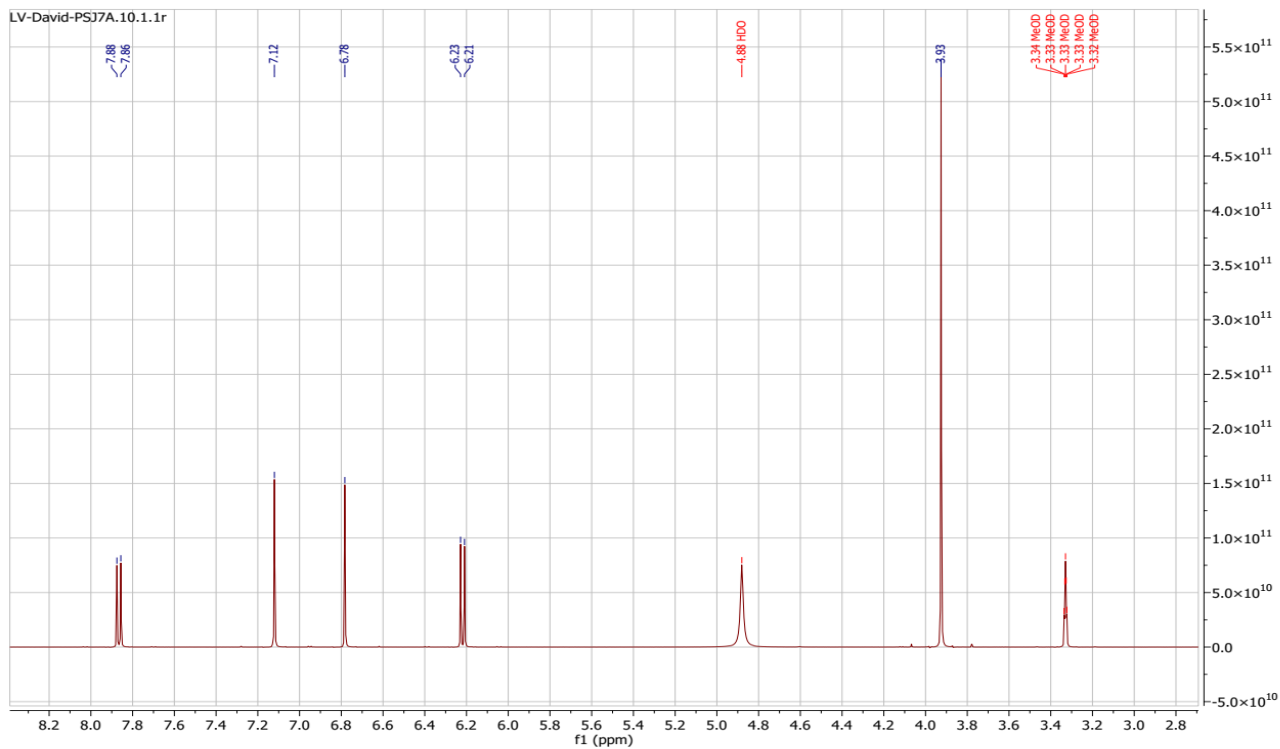

FIGURE S21: <sup>1</sup>H NMR spectrum of compound **9**

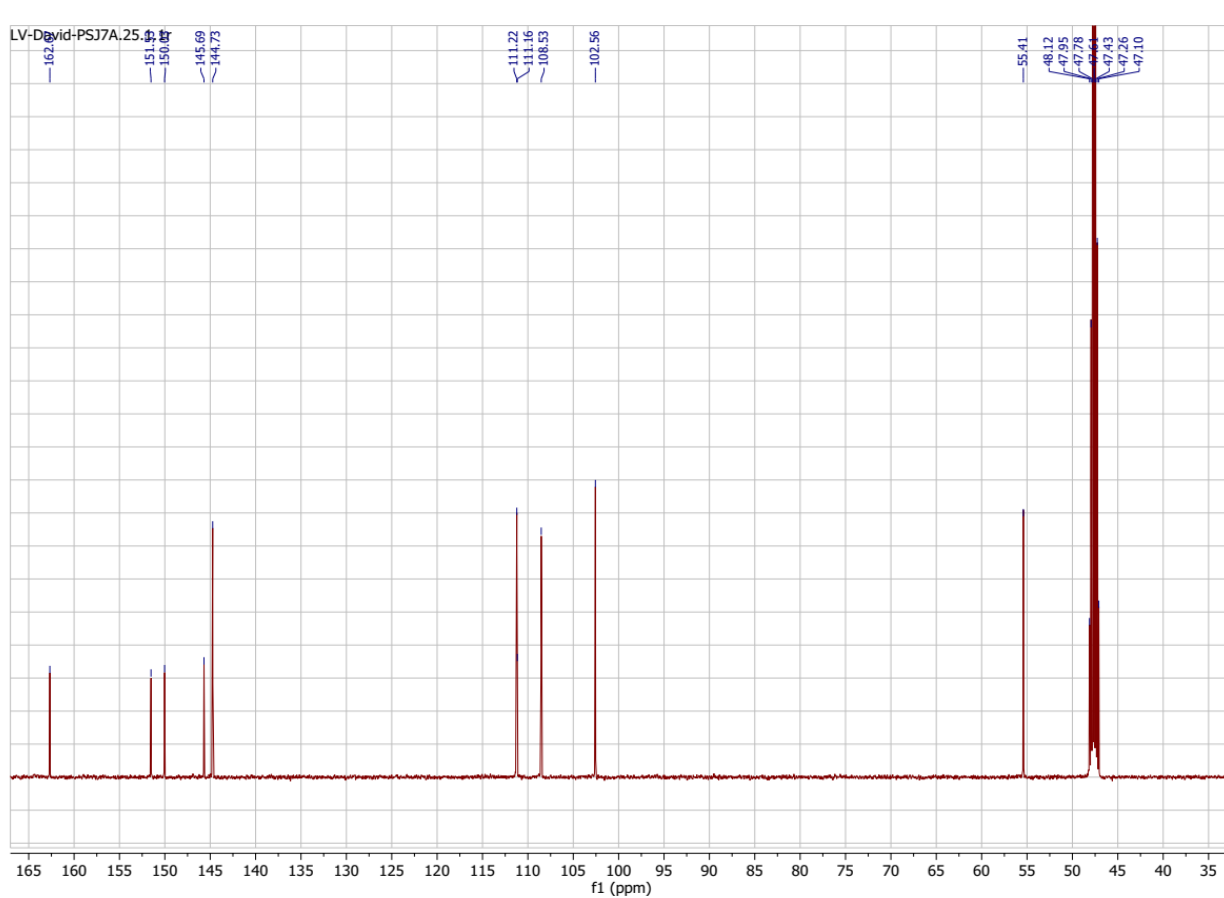

FIGURE S22: <sup>13</sup>C NMR spectrum of compound **9**

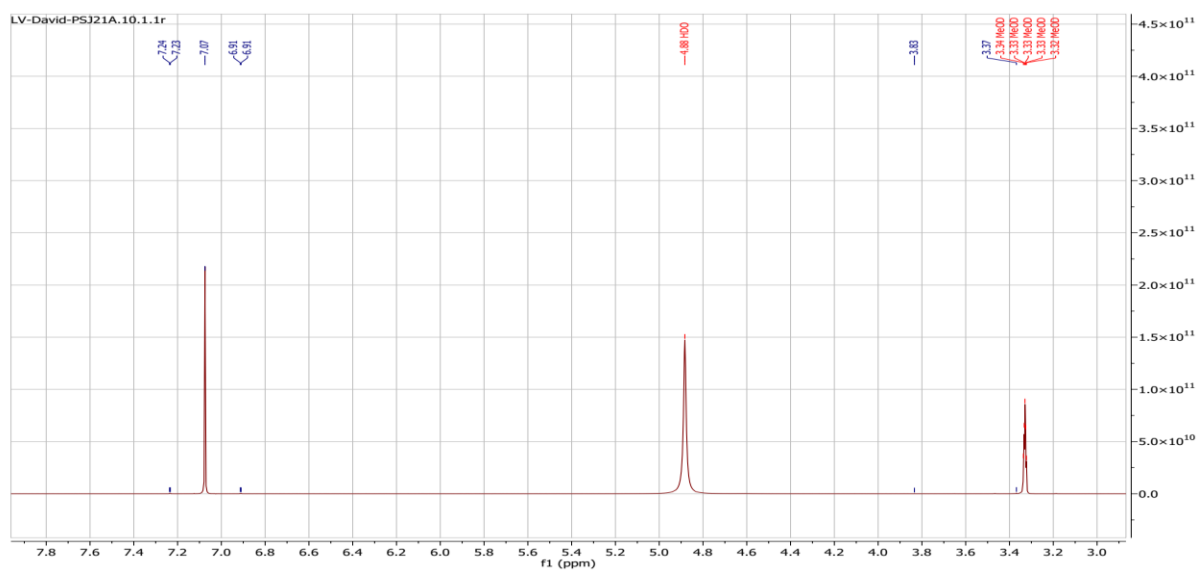

FIGURE S23: <sup>1</sup>H NMR spectrum of compound **10**

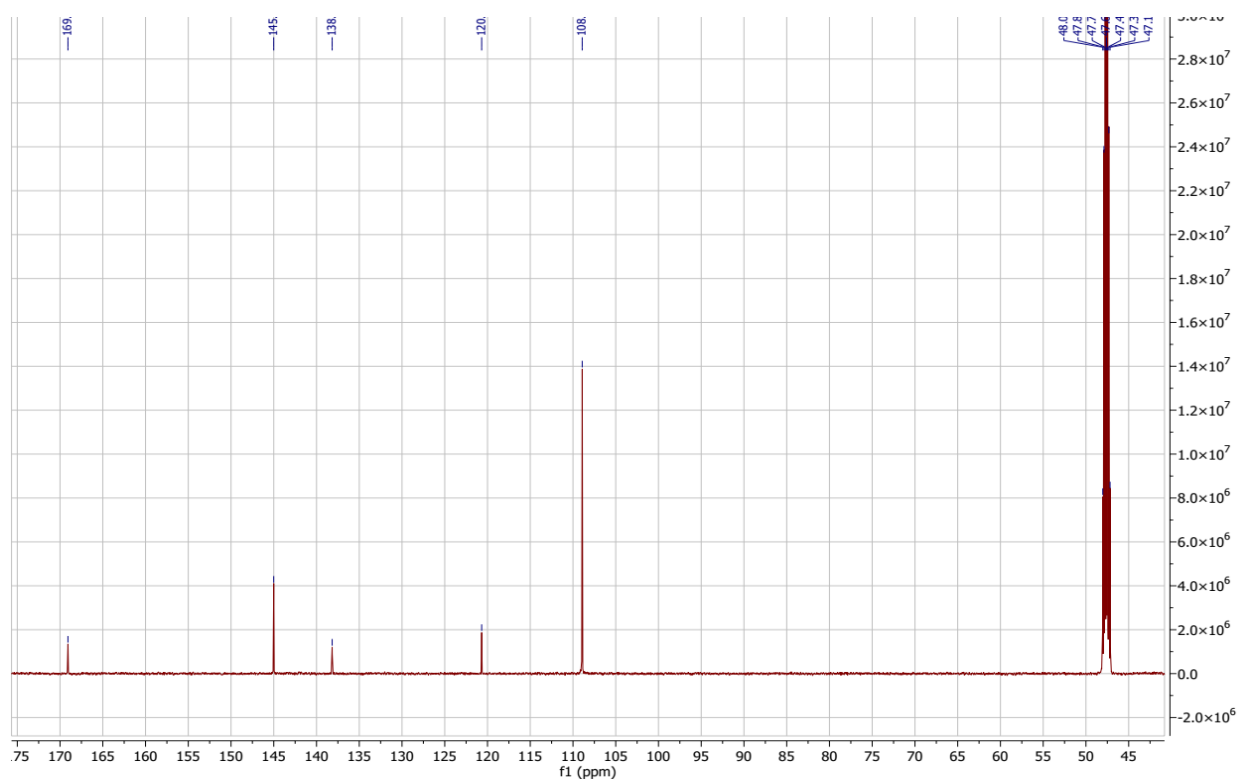

FIGURE S24: <sup>13</sup>C NMR spectrum of compound **10**

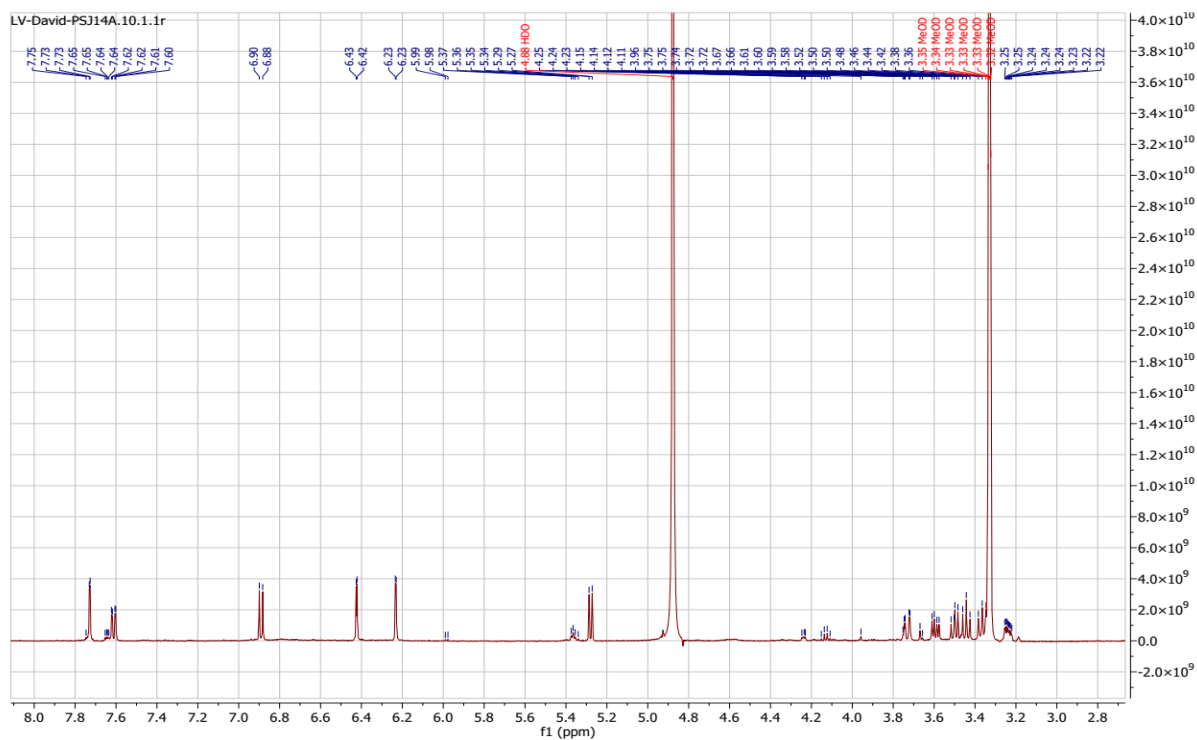

FIGURE S25:  $^1\text{H}$  NMR spectrum of compound **11**

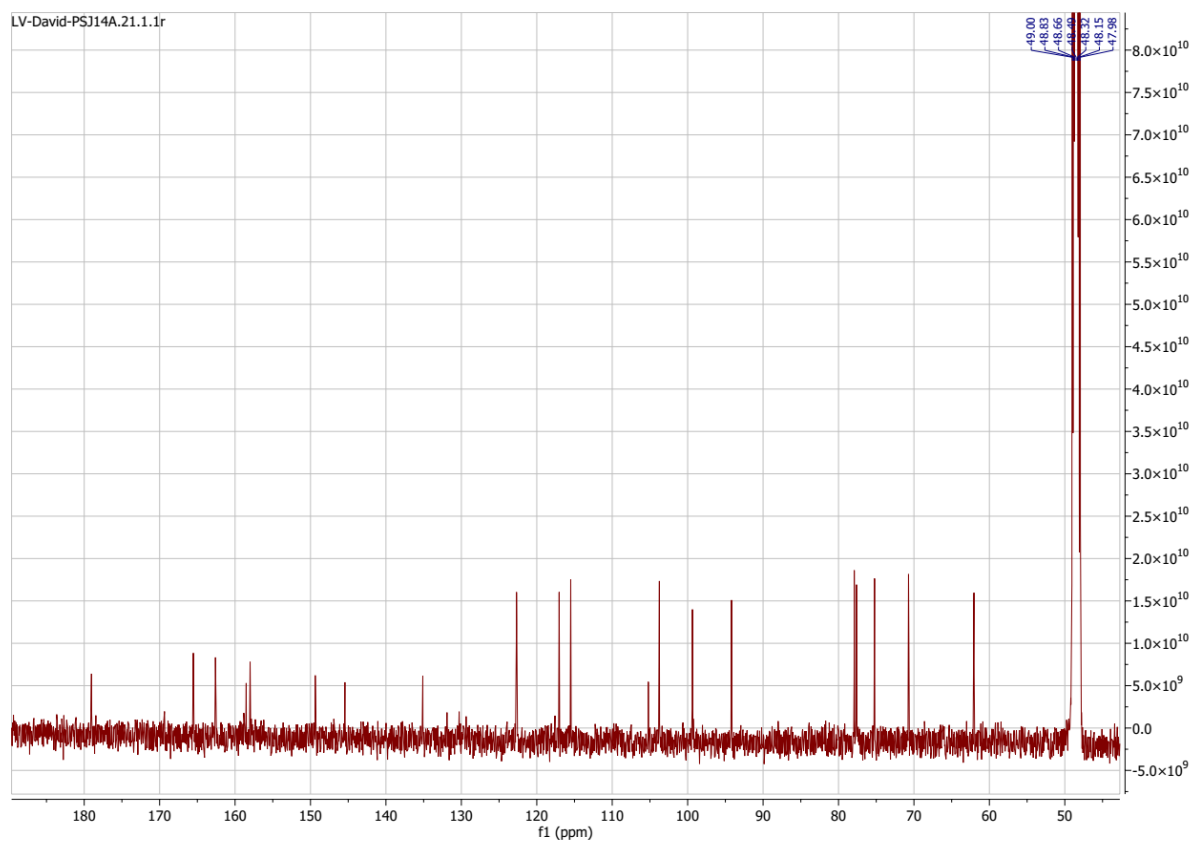

FIGURE S26:  $^{13}\text{C}$  NMR spectrum of compound **11**





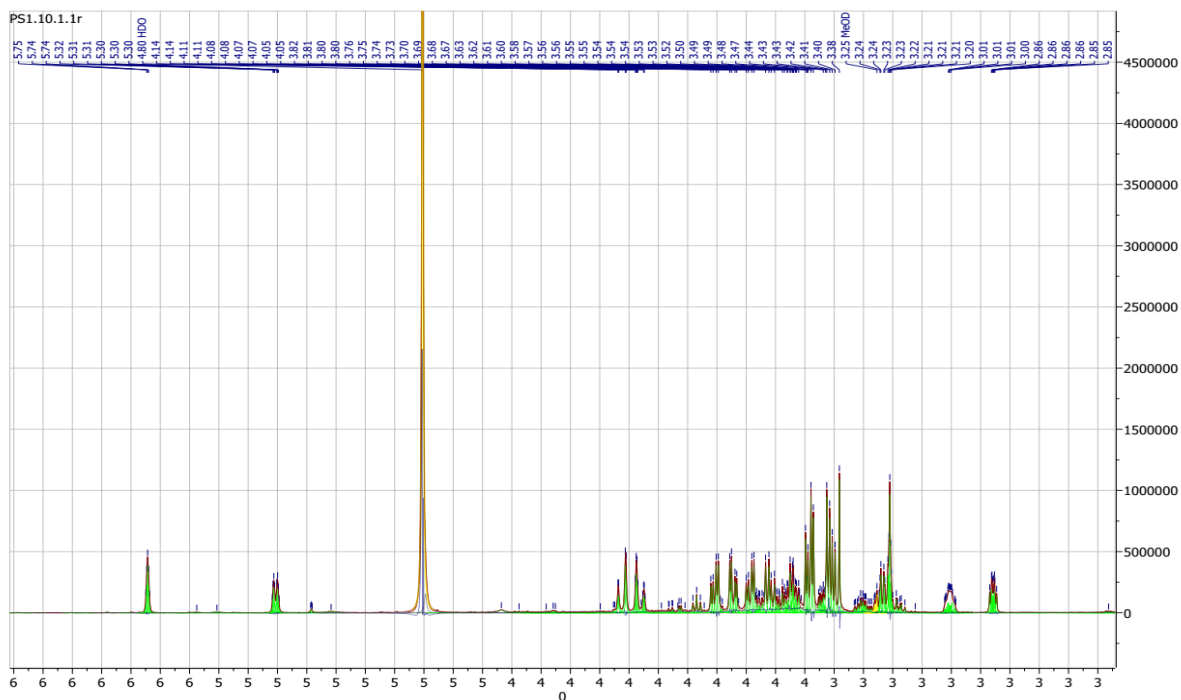

FIGURE S29: <sup>1</sup>H NMR spectrum of compound 13

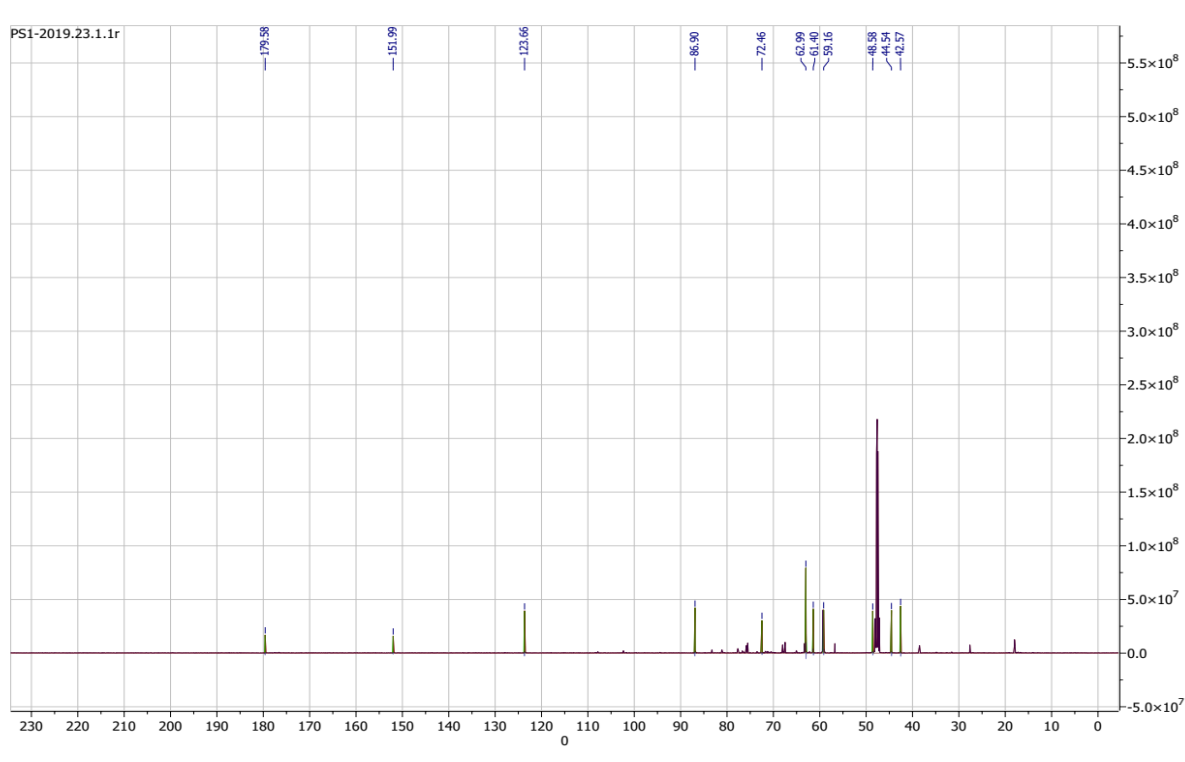

FIGURE S30: <sup>13</sup>C NMR spectrum of compound 13

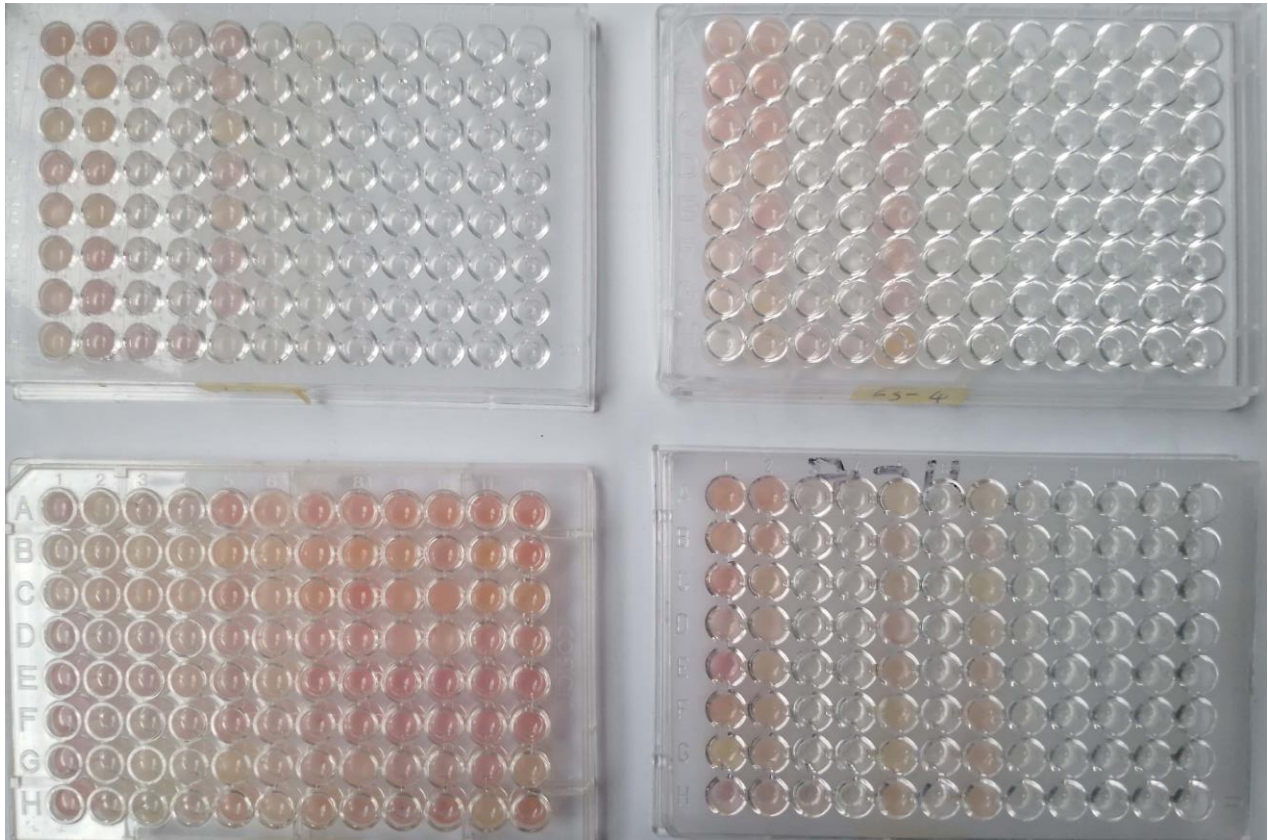

**FIGURE S31:** Microtiter plate images after INT colorimetric assay.

The viability of bacterial cells after treatment with extracts/compounds was determined by the INT assay. Viable bacteria produced a pink coloration from the initial yellow one. The smallest sample concentration values (i.e. MIC) that altered this color change was considered to have offered maximum inhibition of bacterial growth.
